# Supplementary material
Source: PubMed Central journal article supplement (PMC7386476)
Supplement: mmc2.pdf [file mmc2.pdf]

**Table S1 | Cryo-EM data collection, refinement and validation statistics. Related to Figure 2.**

| Dataset                                             | nsp13-RTC (CHAPSO)      |                                                                                    |                                        |
|-----------------------------------------------------|-------------------------|------------------------------------------------------------------------------------|----------------------------------------|
|                                                     | nsp13 <sub>1</sub> -RTC | nsp13 <sub>2</sub> -RTC                                                            | (nsp13 <sub>2</sub> -RTC) <sub>2</sub> |
| <b>Sample ID</b>                                    | nsp13 <sub>1</sub> -RTC | nsp13 <sub>2</sub> -RTC                                                            | (nsp13 <sub>2</sub> -RTC) <sub>2</sub> |
| <b>EMDB</b>                                         | EMD-22270               | EMD-22160                                                                          | EMD-22271                              |
| <b>PDB</b>                                          |                         | 6XEZ                                                                               |                                        |
| <b>Data collection and processing</b>               |                         |                                                                                    |                                        |
| Microscope                                          | FEI Titan Krios         | FEI Titan Krios                                                                    | FEI Titan Krios                        |
| Voltage (kV)                                        | 300                     | 300                                                                                | 300                                    |
| Detector                                            | Gatan K3                | Gatan K3                                                                           | Gatan K3                               |
| Electron exposure (e <sup>-</sup> /Å <sup>2</sup> ) | 64                      | 64                                                                                 | 64                                     |
| Defocus range (µm)                                  | -0.8 to -2.5            | -0.8 to -2.5                                                                       | -0.8 to -2.5                           |
| Data collection mode                                | Counting Mode           | Counting Mode                                                                      | Counting Mode                          |
| Nominal Magnification                               | 81,000x                 | 81,000x                                                                            | 81,000x                                |
| Pixel size (Å)                                      | 1.1                     | 1.1                                                                                | 1.1                                    |
| Symmetry imposed                                    | C1                      | C1                                                                                 | C1                                     |
| Initial particle images (no.)                       | 1447307                 | 1447307                                                                            | 1447307                                |
| Final particle images (no.)                         | 17345                   | 58942                                                                              | 11771                                  |
| Map resolution (Å) - FSC threshold 0.143            | 4.0                     | 3.5                                                                                | 7.9                                    |
| Map resolution range (Å)                            | 3.2-7.6                 | 2.8-7.1                                                                            | 4.0-10.3                               |
| <b>Refinement</b>                                   |                         |                                                                                    |                                        |
| Initial model used (PDB code)                       |                         | 6YYT/6JYT                                                                          |                                        |
| Map sharpening B factor (Å <sup>2</sup> )           | -60.7                   | -76.8                                                                              | -417.7                                 |
| Model composition                                   |                         |                                                                                    |                                        |
| Non-hydrogen atoms                                  |                         | 21,744                                                                             |                                        |
| Protein residues                                    |                         | 2,563                                                                              |                                        |
| Nucleic acid residues (RNA)                         |                         | 70                                                                                 |                                        |
| Ligands                                             |                         | 8 Zn <sup>2+</sup> , 3 Mg <sup>2+</sup> ,<br>3 CHAPSO,<br>3 ADP, 2 AF <sub>3</sub> |                                        |
| B factors (Å <sup>2</sup> )                         |                         |                                                                                    |                                        |
| Protein                                             |                         | 50.08                                                                              |                                        |
| Nucleic acid                                        |                         | 75.64                                                                              |                                        |
| Ligands                                             |                         | 89.8                                                                               |                                        |
| R.m.s. deviations                                   |                         |                                                                                    |                                        |
| Bond lengths (Å)                                    |                         | 0.01                                                                               |                                        |
| Bond angles (°)                                     |                         | 0.945                                                                              |                                        |
| Validation                                          |                         |                                                                                    |                                        |
| MolProbity score                                    |                         | 3.20                                                                               |                                        |
| Clashscore                                          |                         | 19.89                                                                              |                                        |

|                   |       |
|-------------------|-------|
| Poor rotamers (%) | 10.77 |
| Ramachandran plot |       |
| Favored (%)       | 86.91 |
| Allowed (%)       | 13.01 |
| Disallowed (%)    | 0.08  |
