# Supplementary material
Source: PubMed Central journal article supplement (PMC7386476)
Supplement: mmc3.pdf [file mmc3.pdf]

**Table S2. Oligonucleotides used in this study. Related to STAR Methods.**

|                                                                                                                                                                                                                                                                                                                                                                                                                                                                                                                                                                                                                                                                            |                                  |
|----------------------------------------------------------------------------------------------------------------------------------------------------------------------------------------------------------------------------------------------------------------------------------------------------------------------------------------------------------------------------------------------------------------------------------------------------------------------------------------------------------------------------------------------------------------------------------------------------------------------------------------------------------------------------|----------------------------------|
| DNA Quickchange primer forward: 5'-AGCCATCATCATCATCACAGCAGCGG CCTGGAGGTGCTGTTCCAGGGACCTCATATGGCTGTGGGTGCCTGCGTCCTG TGC-3'                                                                                                                                                                                                                                                                                                                                                                                                                                                                                                                                                  | IDT                              |
| DNA Quickchange primer reverse: 5'-GCACAGGACGCAGGCACCCACAGCCATA TGAGGTCCTGGAACAGCACCTCCAGGCCGCTGCTGTGATGATGATGATGAT GGCT-3'                                                                                                                                                                                                                                                                                                                                                                                                                                                                                                                                                | IDT                              |
| E. coli_codon_optimized_nsp7_from_NC_045512.2: 5'-AGTAAGATGAGCGATGTA AGTGTACGTCAGTTGTTCTTCTGTCTGTACTTCAGCAGCTTCGTGTTGAATCAT CGTCCAAGCTGTGGGCCAGTGCCTACAGTTACACAACGACATTTTGTCTGGC GAAGGATACAACGGAAGCCTTTGAGAAGATGGTCTCATTACTTTCGGTCCTTC TTAGTATGCAGGGGCCGTAGACATCAATAAGTTATGTGAAGAAATGCTTGAC AACCGTGCAACGTTACAG-3'                                                                                                                                                                                                                                                                                                                                                          | gBlocks, IDT                     |
| E. coli_codon_optimized_nsp8_from_NC_045512.2: 5'-GCGATTGCGTCAGAGTTC TCAAGTCTTCTAGCTACGCAGCCTTTGCAACCGCTCAGGAAGCATAACGAGCA AGCGGTTGCGAATGGCGACAGCGAGGTCGTATTAATAAAATTGAAAAAAGCC TTAACGTAGCCAAATCCGAATTCGACCGCGACGCAGCGATGCAGCGCAAATTA GAGAAGATGGCCGATCAGGCCATGACACAGATGTATAACAAGCACGCAGTG AAGATAAGCGTGCAAAGGTTACTTCTGCGATGCAAACAATGCTTTTTACGATGT TGCGTAAATTAGACAATGACGCGTTAAACAACATCATTATAATGCCGCGATG GATGCGTACCTCTGAATATTATTCCGTTGACAACCGCCGCGAAATTAATGGTA GTGATTCTGACTACAATACCTATAAAAACACCTGCGACGGAACAACGTTTACA TACGCCTCAGCACTGTGGGAGATTGAGCAGGTGGTGGACGCTGACTCTAAAT CGTACAGTTGTCAGAAATTAGTATGGACAATAGTCCTAACCTTGCTTGCCACT TATTGTCACAGCTCTTCGTGCAAATTCGCGGTCAAATTGCAG-3' | gBlocks, IDT                     |
| I_nsp7_CDFDuet_F: 5'-CGTCGACATGAGTAAGATGAGCGATGTTAAGTGTA-3'                                                                                                                                                                                                                                                                                                                                                                                                                                                                                                                                                                                                                | IDT                              |
| I_nsp7_R_MCS_spacer: 5'-GCATTACTGTAACGTTGCACGGTTGT-3'                                                                                                                                                                                                                                                                                                                                                                                                                                                                                                                                                                                                                      | IDT                              |
| I_nsp8_CDFDuet_R: 5'-AGGTTAATTACTGCAATTTGACCGCGGAAT-3'                                                                                                                                                                                                                                                                                                                                                                                                                                                                                                                                                                                                                     | IDT                              |
| I_nsp8_F_MCS_spacer: 5'-TATACATATGGCGATTGCGTCAGAGTTCTC-3'                                                                                                                                                                                                                                                                                                                                                                                                                                                                                                                                                                                                                  | IDT                              |
| nsp12_frame_shift_forw: 5'-TCAGCTGATGCACAATCGTTTTAAACCGGGTTTGC GGTGTAAG-3'                                                                                                                                                                                                                                                                                                                                                                                                                                                                                                                                                                                                 | IDT                              |
| nsp12_pRSF_BamHI_forw: 5'CGCGGATCCGCTGATGCACAATCGTTTTAAACC-3'                                                                                                                                                                                                                                                                                                                                                                                                                                                                                                                                                                                                              | IDT                              |
| nsp12_pRSF_XhoI_rev:5'-CCCGCTCGAGCGGTCACTGTAAGACTGTATGCGGT GTGTACATAGC-3'                                                                                                                                                                                                                                                                                                                                                                                                                                                                                                                                                                                                  | IDT                              |
| nsp12_RT_oligo_rev: 5'-GATGTTGATATGACATGGTTCGTAACAGC-3'                                                                                                                                                                                                                                                                                                                                                                                                                                                                                                                                                                                                                    | IDT                              |
| nsp12_sequencing_primer_1_forw: 5'-CGCCAACTTAGGTGAACGTGTACGCC-3'                                                                                                                                                                                                                                                                                                                                                                                                                                                                                                                                                                                                           | IDT                              |
| nsp12_sequencing_primer_2_forw: 5'-GGAATTACTTGTGTATGCTGCTGACCC-3'                                                                                                                                                                                                                                                                                                                                                                                                                                                                                                                                                                                                          | IDT                              |
| nsp12_sequencing_primer_3_forw: 5'-GCTCGCACCGTAGCTGGTGTCTCTATC-3'                                                                                                                                                                                                                                                                                                                                                                                                                                                                                                                                                                                                          | IDT                              |
| pCDFDuet MCS Spacer: 5'-TAATGCTTAAGTCGAACAGAAAGTAATCGTATTGTA CACGGCCGCATAATCGAAATTAATACGACTCACTATAGGGGAATTGTGAGCGG ATAACAATCCCCATCTTAGTATATTAGTTAAGTATAAGAAGGAGATATACATAT G-3'                                                                                                                                                                                                                                                                                                                                                                                                                                                                                             | gBlocks, IDT                     |
| Primer RNA (biochemistry): 5'-GUCAUUCUCCUAAGAAGCUA-3'                                                                                                                                                                                                                                                                                                                                                                                                                                                                                                                                                                                                                      | Horizon Discovery Ltd./Dharmacon |
| Primer RNA (cryo-EM): 5'-CGCGUAGCAUGCUACGUCAUUCUCCUAAGAAGCUA -3'                                                                                                                                                                                                                                                                                                                                                                                                                                                                                                                                                                                                           | Horizon Discovery Ltd./Dharmacon |
| Template RNA (biochemistry): 5'-CUAUCCCCAUGUGAUUUUAAUAGCUUCUUAG GAGAAUGAC-3'                                                                                                                                                                                                                                                                                                                                                                                                                                                                                                                                                                                               | Horizon Discovery Ltd./Dharmacon |

|                                                                                           |                                        |
|-------------------------------------------------------------------------------------------|----------------------------------------|
| Template RNA (cryo-EM): 5'-CUAUCCCCAUGUGAUUUUAAUAGCUUCUUAGGA<br>GAAUGACGUAGCAUGCUACGCG-3' | Horizon<br>Discovery<br>Ltd./Dharmacon |
| V_CDFDuet_F_nsp8_overlap: 5'-CAAATTGCAGTAATTAACCTAGGCTGCTGCCA<br>C-3'                     | IDT                                    |
| V_CDFDuet_R_nsp7_overlap: 5'-TCATCTTACTCATGTCGACGGGCCCT-3'                                | IDT                                    |
